# Supplementary material
Source: publisher figshare collection journal article supplement (https://acs.figshare.com/ndownloader/files/5139466)
Supplement: Supplementary file 1 [file 5139466]

 
data_MOF-76

_publ_requested_journal             'J. Am. Chem. Soc.'

_publ_section_title
;
   Rod Packings and Metal-Organic Frameworks Constructed From 
Rod-Shaped Secondary Building Units

;

_publ_contact_author          
;
Omar M. Yaghi
Department of Chemistry
University of Michigan
930 N. University Ave.
Ann Arbor, MI 48109-1055, USA
;
_publ_contact_author_email     oyaghi@umich.edu

loop_
_publ_author_name
_publ_author_address
'Nathaniel L. Rosi'
;  Department of Chemistry
University of Michigan
930 N. University Ave.
Ann Arbor, MI 48109-1055, USA
;
'Jaheon Kim'
; Department of Chemistry
University of Michigan
930 N. University Ave.
Ann Arbor, MI 48109-1055, USA

;

'Mohamed Eddaoudi'
; Department of Chemistry
University of Michigan
930 N. University Ave.
Ann Arbor, MI 48109-1055, USA

;

'Michael O'Keeffe'
; Department of Chemistry and Biochemistry
Arizona State University
Tempe, AZ  85287-1604  USA
;

 
_audit_creation_method            SHELXL-97 
_publ_contact_author_name         'Professor Omar M. Yaghi'
_publ_contact_author_address   
;
Department of Chemistry
930 N. University Ave.
Ann Arbor, MI 48109-1055
USA
;
_publ_contact_author_email        'oyaghi@umich.edu'
_publ_contact_author_fax          '+1 734 763 2307'
_publ_contact_author_phone        '+1 734 615 2146'
_chemical_name_systematic 
; 
 ? 
; 
_chemical_name_common             ? 
_chemical_melting_point           ? 
_chemical_formula_moiety          ? 
_chemical_formula_sum 
 'C12 H13 N O8.5 Tb' 
_chemical_formula_weight          466.16 
 
loop_ 
 _atom_type_symbol 
 _atom_type_description 
 _atom_type_scat_dispersion_real 
 _atom_type_scat_dispersion_imag 
 _atom_type_scat_source 
 'C'  'C'   0.0033   0.0016 
 'International Tables Vol C Tables 4.2.6.8 and 6.1.1.4' 
 'H'  'H'   0.0000   0.0000 
 'International Tables Vol C Tables 4.2.6.8 and 6.1.1.4' 
 'N'  'N'   0.0061   0.0033 
 'International Tables Vol C Tables 4.2.6.8 and 6.1.1.4' 
 'O'  'O'   0.0106   0.0060 
 'International Tables Vol C Tables 4.2.6.8 and 6.1.1.4' 
 'Tb'  'Tb'  -0.1723   4.1537 
 'International Tables Vol C Tables 4.2.6.8 and 6.1.1.4' 
 
_symmetry_cell_setting            tetragonal 
_symmetry_space_group_name_H-M    'P 43 2 2'
_symmetry_space_group_name_Hall   'P 4cw 2c'
 
loop_ 
 _symmetry_equiv_pos_as_xyz 
 'x, y, z' 
 '-x, -y, z+1/2' 
 '-y, x, z+3/4' 
 'y, -x, z+1/4' 
 '-x, y, -z' 
 'x, -y, -z+1/2' 
 'y, x, -z+1/4' 
 '-y, -x, -z+3/4' 
 
_cell_length_a                    10.2792(11) 
_cell_length_b                    10.2792(11) 
_cell_length_c                    14.5376(15) 
_cell_angle_alpha                 90.0 
_cell_angle_beta                  90.0 
_cell_angle_gamma                 90.0 
_cell_volume                      1536.1(3) 
_cell_formula_units_Z             4 
_cell_measurement_temperature     148(2) 
_cell_measurement_reflns_used     2253 
_cell_measurement_theta_min       1.50 
_cell_measurement_theta_max       22.50 
 
_exptl_crystal_description        needle 
_exptl_crystal_colour             colorless 
_exptl_crystal_size_max           .36 
_exptl_crystal_size_mid           .03 
_exptl_crystal_size_min           .03 
_exptl_crystal_density_meas       ? 
_exptl_crystal_density_diffrn     2.016 
_exptl_crystal_density_method     'not measured' 
_exptl_crystal_F_000              900 
_exptl_absorpt_coefficient_mu     4.650 
_exptl_absorpt_correction_type    empirical 
_exptl_absorpt_correction_T_min   .45 
_exptl_absorpt_correction_T_max   .92 
_exptl_absorpt_process_details    ? 
 
_exptl_special_details 
; 
 ? 
; 
 
_diffrn_ambient_temperature       148(2) 
_diffrn_radiation_wavelength      0.71073 
_diffrn_radiation_type            MoK\a 
_diffrn_radiation_source          'fine-focus sealed tube' 
_diffrn_radiation_monochromator   graphite 
_diffrn_measurement_device_type   'Siemens SMART CCD' 
_diffrn_measurement_method        'omega scan' 
_diffrn_detector_area_resol_mean  ? 
_diffrn_standards_number          ? 
_diffrn_standards_interval_count  ? 
_diffrn_standards_interval_time   ? 
_diffrn_standards_decay_%         none 
_diffrn_reflns_number             6913 
_diffrn_reflns_av_R_equivalents   0.057 
_diffrn_reflns_av_sigmaI/netI     ? 
_diffrn_reflns_limit_h_min        -12 
_diffrn_reflns_limit_h_max        12 
_diffrn_reflns_limit_k_min        -12 
_diffrn_reflns_limit_k_max        12 
_diffrn_reflns_limit_l_min        -17 
_diffrn_reflns_limit_l_max        17 
_diffrn_reflns_theta_min          1.75 
_diffrn_reflns_theta_max          25.45 
_reflns_number_total              1630 
_reflns_number_gt                 1082 
_reflns_threshold_expression      >2.5sigma(I) 
 
_computing_data_collection        'Siemens SMART' 
_computing_cell_refinement        'Siemens SMART' 
_computing_data_reduction         'Siemens SAINT' 
_computing_structure_solution     'teXan' 
_computing_structure_refinement   'teXan' 
_computing_molecular_graphics     'Siemens SHELX-TL xp' 
_computing_publication_material   'Siemens SHELX-TL xcif' 
 
_refine_special_details 
; 
 ?
; 
 
_refine_ls_structure_factor_coef  F   
_refine_ls_matrix_type            full 
_refine_ls_weighting_scheme       calc  
_refine_ls_weighting_details      ?
_atom_sites_solution_primary      direct 
_atom_sites_solution_secondary    difmap 
_atom_sites_solution_hydrogens    geom 
_refine_ls_hydrogen_treatment     mixed 
_refine_ls_extinction_method      none 
_refine_ls_extinction_coef        ? 
_refine_ls_extinction_expression  ?
_refine_ls_number_reflns          1082 
_refine_ls_number_parameters      119 
_refine_ls_number_restraints      ? 
_refine_ls_R_factor_all           0.045 
_refine_ls_R_factor_gt            0.026 
_refine_ls_wR_factor_gt           0.025 
_refine_ls_goodness_of_fit_ref    0.89 
_refine_ls_restrained_S_all       ? 
_refine_ls_shift/su_max           0.016 
_refine_ls_shift/su_mean          ? 
 
loop_ 
 _atom_site_label 
 _atom_site_type_symbol 
 _atom_site_fract_x 
 _atom_site_fract_y 
 _atom_site_fract_z 
Tb1 Tb 0.14871(3) 0.1487 0.6250    
O1 O 0.0709(6) 0.3353(6) 0.5582(4)   
O2 O 0.1106(6) 0.9309(5) 0.6521(4)    
O3 O 0.0919(5) 0.7562(5) 0.7353(4)   
O4 O 0.314(4) 0.310(4) 0.603(2)    
O6 O 0.366(8) 0.621(10) 0.541(5)   
O7 O 0.598(4) 0.812(3) 0.479(2)  
O8 O 0.537(5) 0.747(4) 0.586(3)   
O9 O 0.400(3) 0.731(3) 0.637(3)  
O10 O 0.353(3) 0.526(4) 0.489(3)  
O11 O 0.405(7) 0.437(8) 0.569(5)  
O12 O 0.563(3) 0.328(3) 0.561(2)  
O13 O 0.684(5) 0.705(5) 0.557(3)  
O14 O 0.5000 0.747(7) 0.5000  
C1 C 0.0000  0.539(1) 0.5000  
C2 C 0.0405(7) 0.6051(7) 0.5769(5)  
C3 C 0.0410(8) 0.7390(7) 0.5767(5)  
C4 C 0.0000 0.806(1) 0.5000  
C5 C 0.0000 0.391(1) 0.5000  
C6 C 0.0857(8) 0.8145(7) 0.6598(6)  
H1 H 0.0733 0.5642 0.6283  
H2 H 0.0000 0.8990 0.5000  
 
loop_ 
 _atom_site_aniso_label 
 _atom_site_aniso_U_11 
 _atom_site_aniso_U_22 
 _atom_site_aniso_U_33 
 _atom_site_aniso_U_23 
 _atom_site_aniso_U_13 
 _atom_site_aniso_U_12 
Tb1 0.0141(2) 0.0141 0.0104(2) 0.0019(3) 0.0000 0.0000(2)
O1 0.088(5) 0.012(3) 0.033(3) 0.004(3) -0.037(3) -0.003(3)
O2 0.097(6) 0.010(3) 0.045(4) -0.004(3) -0.018(3) -0.005(3)
O3 0.056(4) 0.039(4) 0.019(3) -0.019(3) -0.008(3) 0.002(3)
O4 0.04(1) 0.03(1) 0.08(2) -0.020(5) 0.03(2) 0.00(2)
C1 0.017(6) 0.016(6) 0.026(7) 0.0000 -0.005(5) 0.0000
C2 0.031(5) 0.018(4) 0.005(4) 0.001(3) -0.006(3) 0.000(3)
C3 0.017(4) 0.021(5) 0.014(4) -0.001(3) -0.005(4) -0.008(4)
C4 0.035(7) 0.012(6) 0.017(6) 0.0000 0.001(6) 0.0000
C5 0.051(8) 0.014(6) 0.023(7) 0.0000 -0.014(6) 0.0000
C6 0.026(4) 0.028(6) 0.027(5) 0.005(4) -0.003(4) -0.002(4)
 
_geom_special_details 
; 
 ?
; 
 
loop_ 
 _geom_bond_atom_site_label_1 
 _geom_bond_atom_site_label_2 
 _geom_bond_distance 
 _geom_bond_site_symmetry_2 
 _geom_bond_publ_flag 
Tb1 O1 2.294(6) . ?     
Tb1 O2 2.307(5) 1_545 ?      
Tb1 O3 2.329(5) 6_566 ?      
Tb1 O3 2.329(5) 3_654 ?      
Tb1 O4 2.40(4) . ?     
O6 O13 1.75(7)  5_656 ?     
O7 O14 1.25(4) . ?    
O8 O9 1.60(5) . ?    
O8 O13 1.62(6) . ?    
O8 O14 1.30(5) . ?    
O10 O11 1.58(7) . ?    
C1 C2 1.372(9) . ?    
O1 C5 1.256(7) . ?     
C1 C2 1.372(9) 5_556 ?     
O2 C6 1.228(9) . ?     
C1 C5 1.52(1) . ?    
O3 C6 1.253(9) . ?     
C2 C3 1.38(1) . ?    
C3 C4 1.377(9) . ?    
O4 O11 1.67(7) . ?     
C3 C6 1.51(1) . ?    
  
_diffrn_measured_fraction_theta_max    0.999 
_diffrn_reflns_theta_full              25.45 
_diffrn_measured_fraction_theta_full   0.999 
_refine_diff_density_max    0.676 
_refine_diff_density_min   -0.53 
_refine_diff_density_rms    ? 
